# Supplementary material
Source: PubMed Central journal article supplement (PMC1347311)

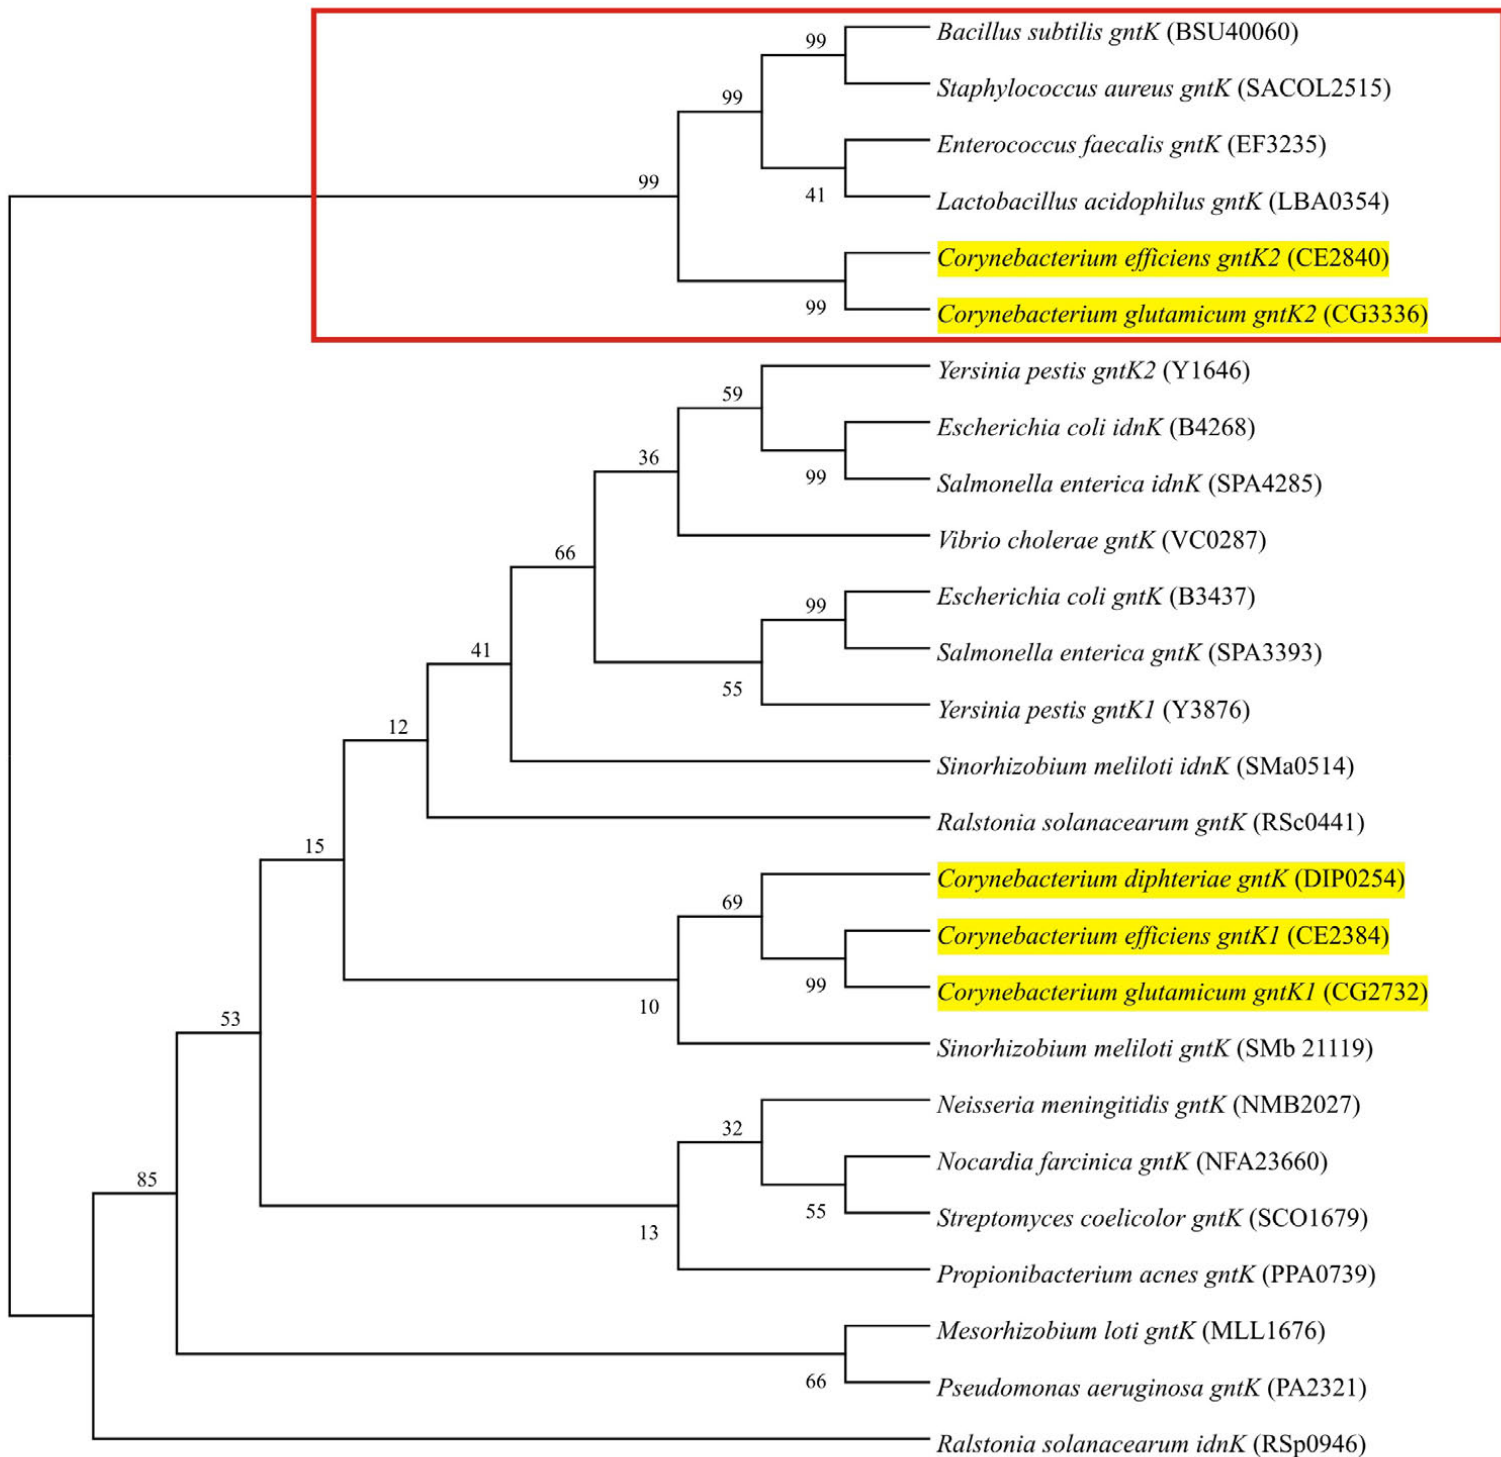

Fig. S1

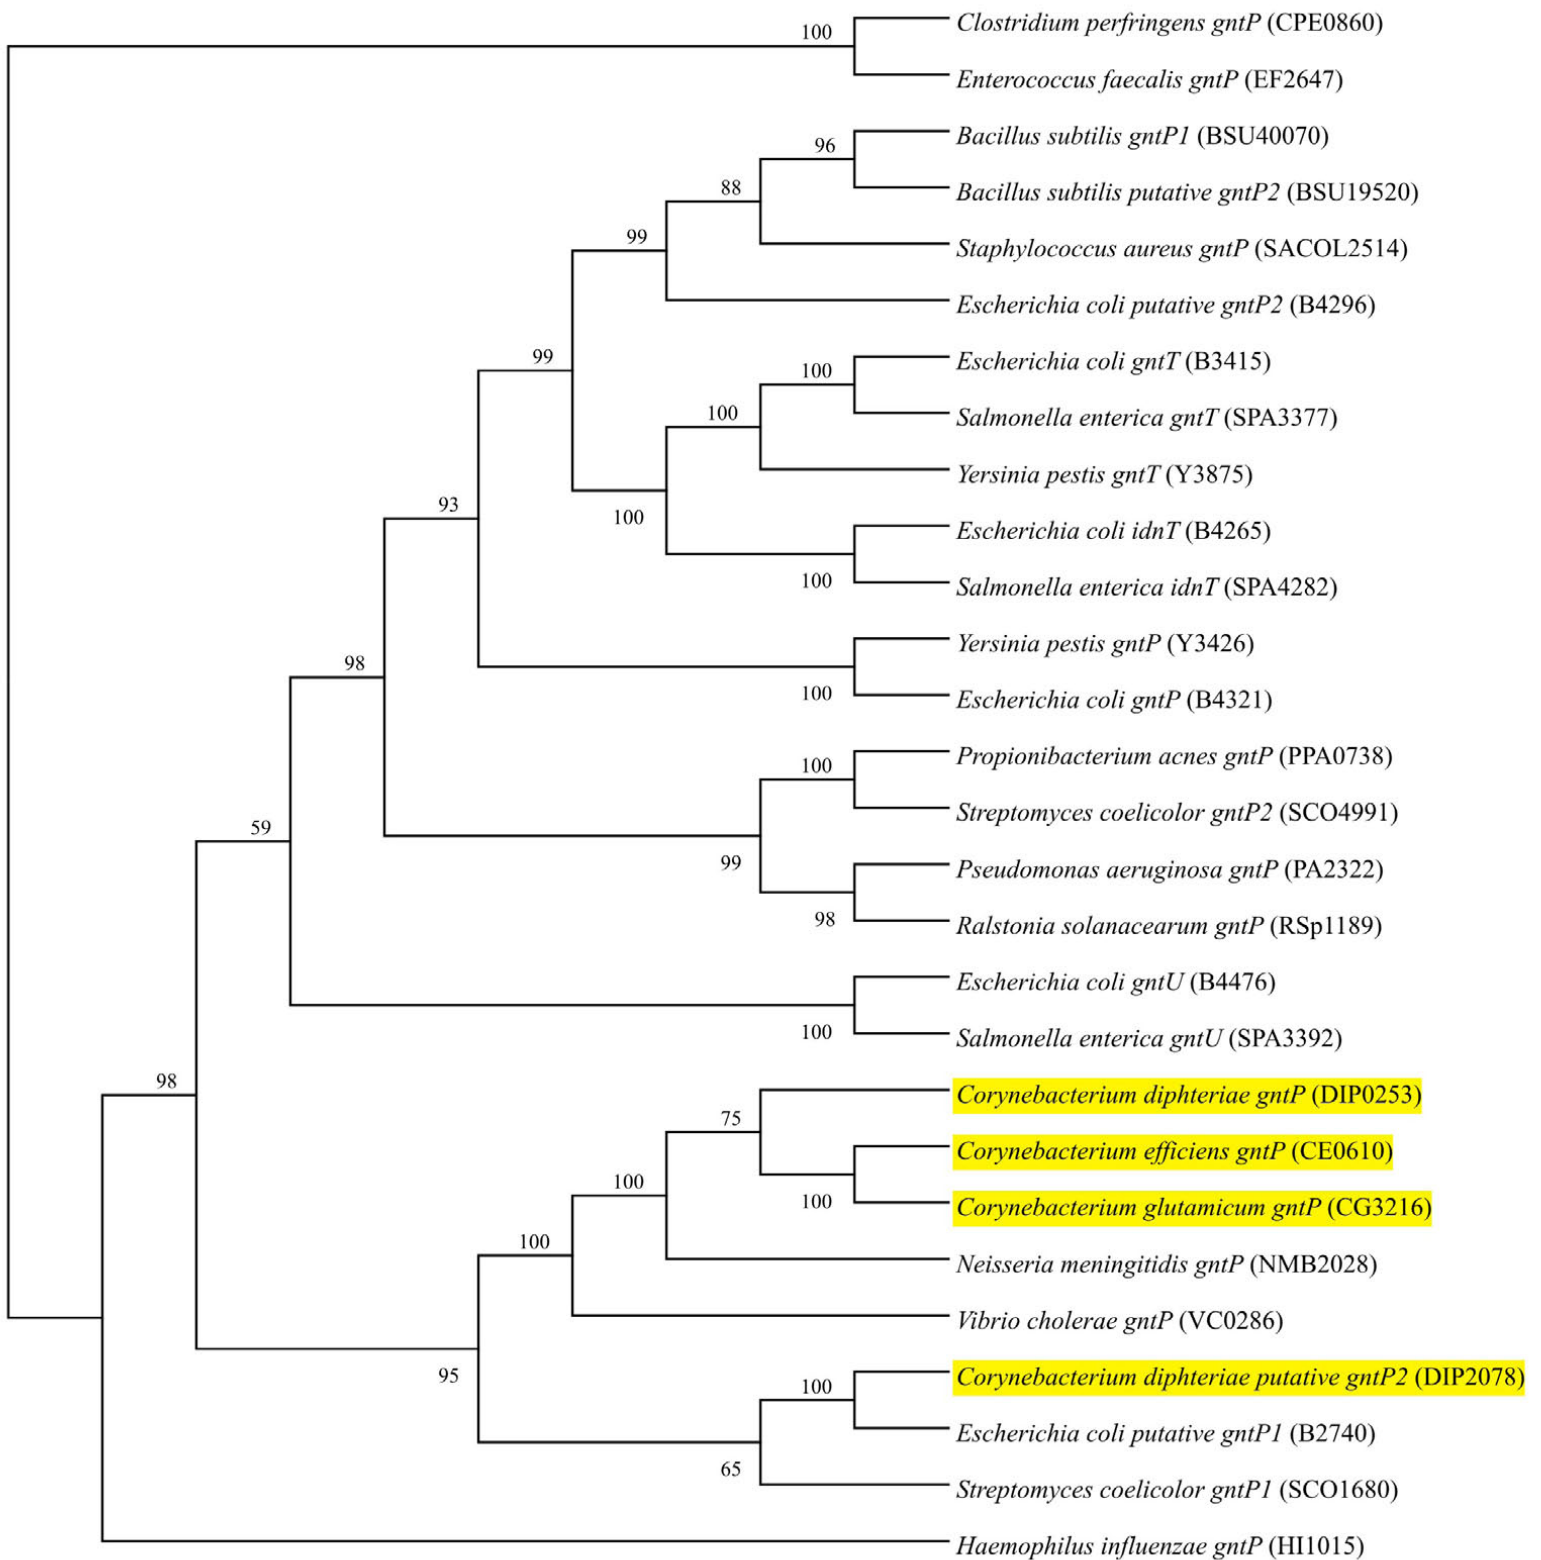

Fig. S2

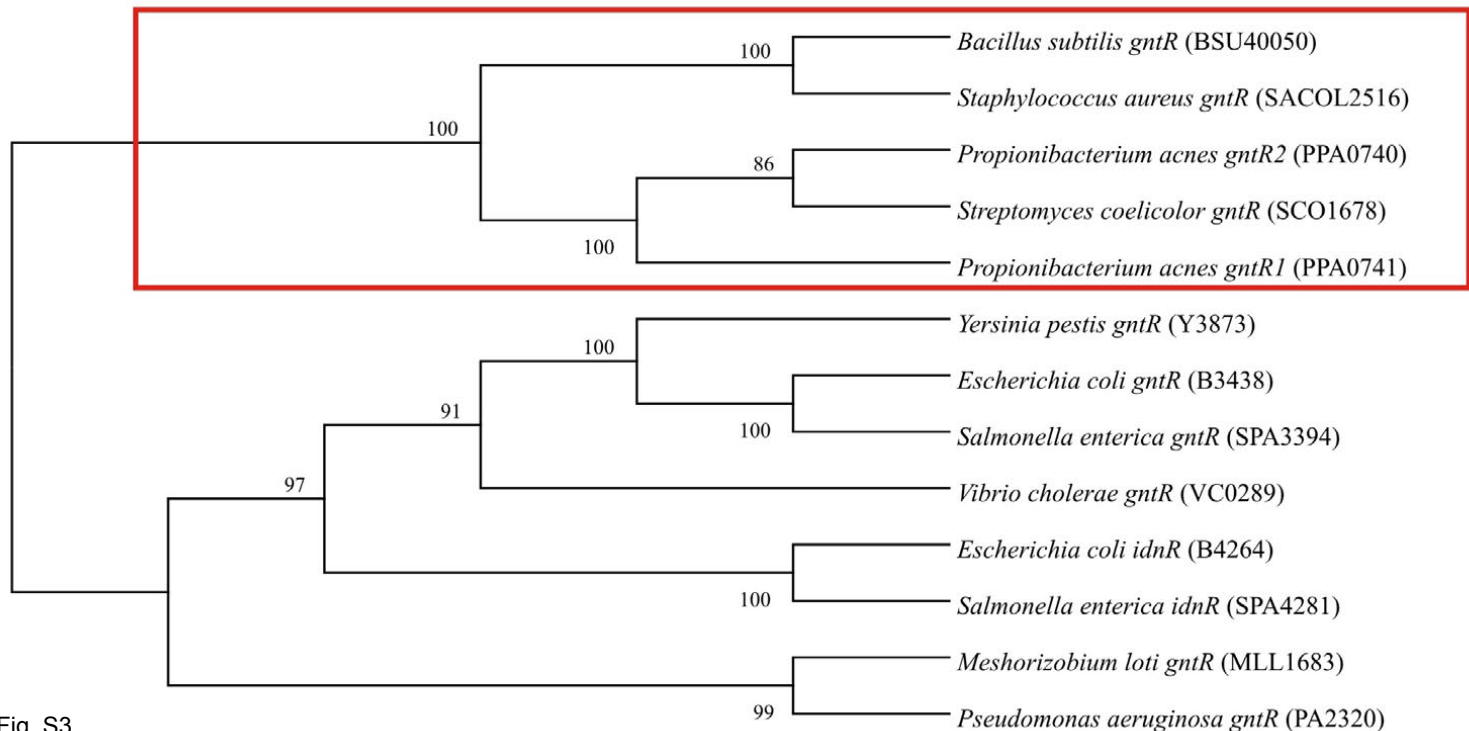

Fig. S3

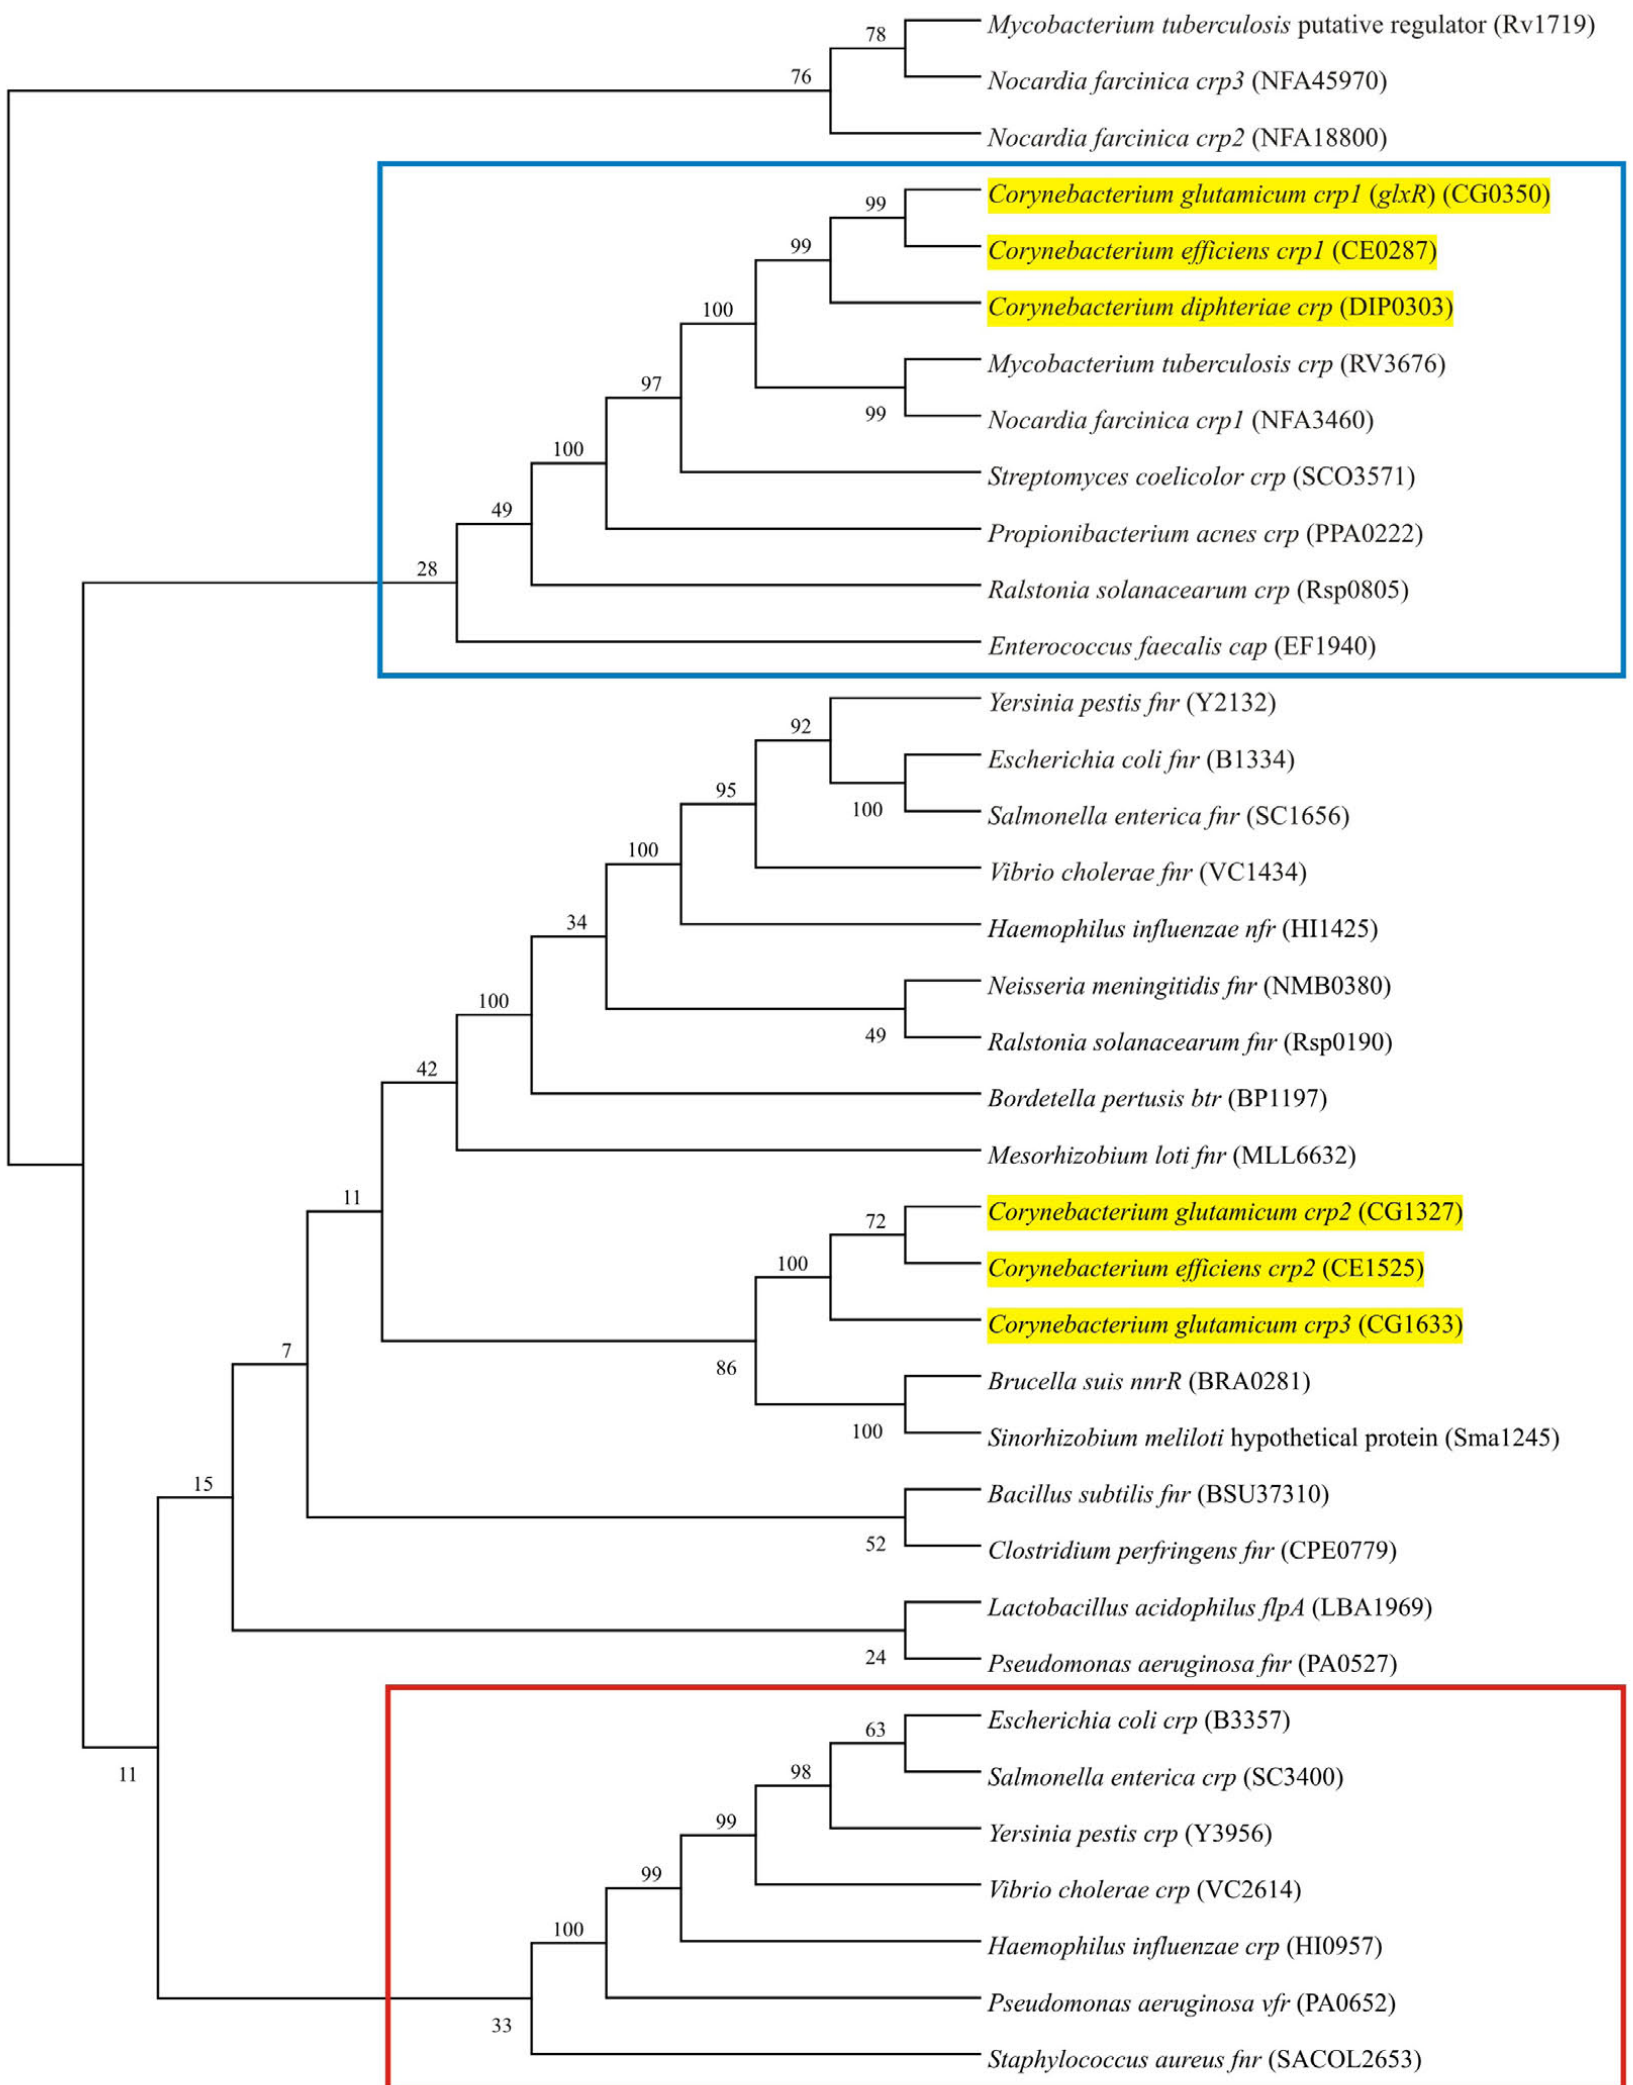

Fig. S4

Supplement: jbacter_188_2_409__1.pdf [file jbacter_188_2_409__1.pdf]
